# Supplementary material
Source: PubMed Central journal article supplement (PMC3458384)
Supplement: 1205037109_sapp.pdf [file 1205037109_sapp.pdf]

# 1 Supporting Information

2 Deng & Schmid et al., "The fatty acid signal receptor RpfR links quorum sensing with  
3 regulation of virulence through cyclic-di-GMP turnover"

4

5 ***Index*** ***Page***

6 **Experimental methods** 2

7 **Table S1.** Conservation of RpfR and RpfF<sub>Bc</sub> in various bacterial species 5

8 **Table S2.** Bacterial strains and plasmids used in this study 7

9 **Table S3.** PCR primers used in this study 9

10 **Fig. S1.** Influence of BCAM0227 and RpfR on intracellular cyclic-di-GMP level 10

11 **Fig. S2.** Mutation of *BCAM0227* does not affect *rpfR*-regulated phenotypes 11

12 **Fig. S3.** Complementation of *rpfR* with RpfR, RpfR<sub>AAL</sub> and RpfR<sub>GGAAF</sub> 12

13 **Fig. S4.** *In trans* expression of RocR from *Pseudomonas aeruginosa* 13

14 **Fig. S5.** SDS-PAGE gel electrophoresis of the purified RpfR protein 14

15 **Fig. S6.** ITC analysis of interaction between BDSF analogues and RpfR 14

16 **Fig. S7.** Effect of BDSF and analogues on BDSF-regulated phenotypes 15

17 **Fig. S8.** ITC analysis of interaction between BDSF and RpfR domains 16

18 **Fig. S9.** HPLC analysis of RpfR cyclic-di-GMP phosphodiesterase activity 17

19 **Fig. S10.** Effect of BDSF and analogues on RpfR enzyme activity 18

20 **Fig. S11.** Impact of BDSF on RpfR protein conformation 18

21

22

23

24

25

26

1 **Experimental methods:**

2 **Construction of Mutants and Complementation of Strains.** *B. cenocepacia* H111 was  
3 used as the parental strain to generate the in-frame deletion mutants of *rpfF<sub>Bc</sub>* and *rpfR*,  
4 respectively, following the methods described previously (16). The primers to generate  
5 upstream and downstream regions flanking *rpfF<sub>Bc</sub>* and *rpfR* are listed in SI Appendix, Table  
6 S3. For complementation analysis, the coding regions of RpfF<sub>Bc</sub>, RpfR and the relevant  
7 domains of RpfR were amplified by PCR using the primers listed in SI Appendix, Table S3,  
8 and cloned under the control of the *S7* ribosomal protein promoter in plasmid vector pMSL7  
9 or under the control of *lac* promoter in the vector pLAFR3. The resulting constructs were  
10 conjugated into *B. cenocepacia* H111 deletion mutants using tri-parental mating with  
11 pRK2013 as the mobilizing plasmid.

12  
13 **Determination of Intracellular Cyclic-Di-GMP Level.** *B. cenocepacia* strain H111 and its  
14 derivatives were grown in 1 liter of NYG medium at 37°C for 24 h with shaking at 200 rpm.  
15 Intracellular cyclic-di-GMP molecules were isolated as described previously (31). The  
16 samples were filtered using a 0.2 µm pore size cellulose-acetate filter, and 20 µl of each  
17 sample was detected at 252 nm on a Waters LC chromatographic system on a reverse-  
18 phase column (Phenomenex Luna, 5 µm C18, 250 by 4.60 mm) and eluted with an isocratic  
19 mobile phase (150 mM NaH<sub>2</sub>PO<sub>4</sub>, pH 5.2, containing 2% acetonitrile, v/v) at 1 ml min<sup>-1</sup>.  
20 Synthetic cyclic-di-GMP (BioLog) was used as a standard.

21  
22 **Biofilm Formation, Swarming Motility and Proteolytic Activity Assays.** Biofilm formation  
23 in 96-well polypropylene microtiter dishes was assayed essentially as described previously  
24 by Huber et al (2001) (32). Swarming motility was determined on semi-solid agar (0.5%).  
25 Bacteria were inoculated into the center of plates containing 0.8% tryptone, 0.5% glucose,  
26 and 0.5% agar. The plates were incubated at 37°C for 24 h before the diameter of the colony  
27 was measured. Protease assay was performed following the previously described method

1 (33). Protease activity was obtained after normalization of absorbance against  
2 corresponding cell density.

3

4 **Protein Expression and Purification.** The coding region of *rpfR* was amplified with the  
5 primers listed in Table S3 and fused to the expression vector pGEX-6p-1 (Amersham). The  
6 fusion gene construct was transformed into the *E. coli* strain BL21. Affinity purification of  
7 GST-RpfR fusion proteins was performed following the method described previously (34).  
8 Fusion protein cleavage with PreScission Protease (GE Healthcare; 2 units/100  $\mu$ l of bound  
9 proteins) was conducted at 4°C overnight. The cleaved fusion proteins were eluted and  
10 analyzed by SDS-PAGE.

11

12 **Site-Directed Mutagenesis of pBBR-*rpfR*.** Point mutations in pBBR-*rpfR* were generated  
13 on the basis of the QuikChange site directed mutagenesis system (Agilent). Briefly, to  
14 introduce the desired point mutations, the plasmid was amplified with *PfuTurbo* DNA  
15 Polymerase (Agilent) using the primer pairs AAL-fw/AAL-rev or GGAAF-fw/GGAAF-rev that  
16 contain the desired nucleotide substitution. The reaction mix was then digested with *DpnI*  
17 and transformed into *E. coli* XL1blue. Mutations were confirmed by sequencing.

18

19 **CD Spectroscopy and ITC.** Far-UV circular dichroism (CD) analysis of RpfR was carried  
20 out on a JASCO J-810 spectropolarimeter as previously described (35). RpfR and BDSF  
21 solutions were mixed at room temperature for 1 h at a final concentration of 20  $\mu$ M and 200  
22  $\mu$ M, respectively. The isothermal titration calorimetry (ITC) measurements were obtained  
23 using a VP-ITC ITC microcalorimeter following the manufacturer's protocol (MicroCal,  
24 Northampton, MA). In brief, titrations began with one injection of 2  $\mu$ l of BDSF solution into  
25 the sample cell containing 1.4 ml of RpfR solution (20  $\mu$ M) in the VP-ITC microcalorimeter.  
26 The volume of BDSF injection was changed to 10  $\mu$ l in the subsequent twenty-eight  
27 injections. The heat changes accompanying injections were recorded. The titration

1 experiment was repeated at least twice, and the data were calibrated with a buffer control  
2 and fitted with the one-site model to determine the binding constant ( $K_a$ ) using the MicroCal  
3 ORIGIN version 7.0 software.

4  
5 **Enzyme Activity Analysis.** The enzyme activity of RpfR was determined following the  
6 methods previously described (34). BDSF and RpfR in PBS buffer were mixed and  
7 incubated at room temperature for 1 h. An equal volume of PBS buffer was used as control.  
8 Cyclic-di-GMP was dissolved in TME buffer (Tris-HCl, 60 mM; MgCl<sub>2</sub>, 10 mM; and EDTA, 1  
9 mM; pH 7.5) and added to the mixture at a final concentration of 250 μM, while the final  
10 concentrations of BDSF and RpfR were 50 μM and 2 μM, respectively. The reaction mixture  
11 was kept at 37°C, and aliquots (50 μl) of samples were taken at various time points as  
12 indicated. The reaction was stopped by placing the sample tube in boiling water for 5 min.  
13 Cyclic-di-GMP level was measured by HPLC as described above.

14  
15  
16  
17  
18  
19  
20  
21  
22  
23  
24  
25  
26  
27

1 **Table S1.** Conservation of RpfR and RpfF<sub>Bc</sub> in various bacterial species

| <b>Bacteria</b>                                            | <b>Strain</b> | <b>RpfR<br/>homologue<br/>Accession No.</b> | <b>RpfR<br/>homologue<br/>Identity (%)</b> | <b>RpfF<sub>Bc</sub><br/>homologue<br/>Accession No.</b> | <b>RpfF<sub>Bc</sub><br/>homologue<br/>Identity (%)</b> |
|------------------------------------------------------------|---------------|---------------------------------------------|--------------------------------------------|----------------------------------------------------------|---------------------------------------------------------|
| <u><i>Burkholderia</i></u>                                 |               |                                             |                                            |                                                          |                                                         |
| <i>B. cenocepacia</i>                                      | J2315         | CAR54438                                    | 100                                        | CAR54439                                                 | 100                                                     |
| <i>B. cepacia</i>                                          | 383           | ABB12684                                    | 96                                         | ABB12683                                                 | 95                                                      |
| <i>B. multivorans</i>                                      | ATCC17616     | ABX18792                                    | 93                                         | ABX18791                                                 | 94                                                      |
| <i>B. dolosa</i>                                           | AUO158        | EAY71441                                    | 92                                         | EAY71442                                                 | 97                                                      |
| <i>B. ambifaria</i>                                        | MEX-5         | EDT41907                                    | 92                                         | EDT41908                                                 | 95                                                      |
| <i>B. vietnamiensis</i>                                    | G4            | ABO57013                                    | 91                                         | ABO57014                                                 | 95                                                      |
| <i>B. ubonensis</i>                                        | Bu            | ZP_02382568                                 | 86                                         | ZP_02382569                                              | 90                                                      |
| <i>B. phymatum</i>                                         | STM815        | ACC74359                                    | 66                                         | ACC74358                                                 | 74                                                      |
| <i>B. xenovorans</i>                                       | LB400         | ABE34804                                    | 66                                         | ABE34805                                                 | 71                                                      |
| <i>B. graminis</i>                                         | C4D1M         | EDT13013                                    | 66                                         | EDT13012                                                 | 72                                                      |
| <i>B. phytofirmans</i>                                     | PsJN          | ACD19812                                    | 66                                         | ACD19813                                                 | 72                                                      |
| <u><i>Achromobacter</i></u>                                |               |                                             |                                            |                                                          |                                                         |
| <i>A. xylosoxidans</i>                                     | A8            | ADP15809                                    | 63                                         | ADP15810                                                 | 70                                                      |
| <i>A. piechaudii</i>                                       | ATCC43553     | EFF75758                                    | 63                                         | EFF75759                                                 | 68                                                      |
| <i>A. sp.</i>                                              | SY8           | EHK66463                                    | 62                                         | EHK66462                                                 | 68                                                      |
| <u><i>Yersinia</i></u>                                     |               |                                             |                                            |                                                          |                                                         |
| <i>Y. mollaretii</i>                                       | ATCC43969     | EEQ10338                                    | 61                                         | EEQ10337                                                 | 67                                                      |
| <i>Y. aldovae</i>                                          | ATCC35236     | EEP94463                                    | 61                                         | EEP94464                                                 | 67                                                      |
| <i>Y. intermedia</i>                                       | ATCC29909     | EEQ17658                                    | 61                                         | EEQ17659                                                 | 68                                                      |
| <i>Y. ruckeri</i>                                          | ATCC29473     | EEP98557                                    | 61                                         | EEP98558                                                 | 67                                                      |
| <i>Y. enterocolitica</i><br>subsp.<br><i>palaearctica</i>  | 105.5R(r)     | ADZ40552                                    | 61                                         | ADZ40551                                                 | 67                                                      |
| <i>Y. bercovieri</i>                                       | ATCC43970     | EEQ07113                                    | 61                                         | EFQ07114                                                 | 69                                                      |
| <i>Y. rohdei</i>                                           | ATCC43380     | EEQ03158                                    | 61                                         | EEQ03157                                                 | 67                                                      |
| <i>Y. kristensenii</i>                                     | ATCC33638     | EEP90234                                    | 61                                         | EEP90233                                                 | 68                                                      |
| <i>Y. frederiksenii</i>                                    | ATCC33641     | EEQ13950                                    | 60                                         | EEQ13949                                                 | 67                                                      |
| <i>Y. enterocolitica</i><br>subsp<br><i>enterocolitica</i> | 8081          | CAL10197                                    | 60                                         | CAL10196                                                 | 67                                                      |
| <u><i>Serratia</i></u>                                     |               |                                             |                                            |                                                          |                                                         |
| <i>S. odorifera</i>                                        | 4Rx13         | EFA14792                                    | 61                                         | EFA14793                                                 | 69                                                      |
| <i>S. sp.</i>                                              | AS9           | AEF47930                                    | 61                                         | AEF47931                                                 | 69                                                      |
| <i>S. proteamaculans</i>                                   | 568           | ABV43835                                    | 60                                         | ABV43836                                                 | 70                                                      |
| <u><i>Enterobacter</i></u>                                 |               |                                             |                                            |                                                          |                                                         |
| <i>E. asburiae</i>                                         | LF7a          | AEN65083                                    | 57                                         | AEN65084                                                 | 63                                                      |
| <i>E. cancerogenus</i>                                     | ATCC35316     | EFC56872                                    | 57                                         | EFC56873                                                 | 63                                                      |

|                                         |              |              |    |              |    |
|-----------------------------------------|--------------|--------------|----|--------------|----|
| <i>E. cloacae</i> sp.<br><i>cloacae</i> | ATCC 13047   | YP_003612261 | 57 | YP_003612260 | 63 |
| <i>E. mori</i>                          | LMG25706     | ZP_09038026  | 56 | ZP_09038027  | 63 |
| <i>E. sp.</i>                           | 638          | ABP60856     | 56 | ABP60857     | 63 |
| <br><u><i>Pantoea</i></u>               |              |              |    |              |    |
| <i>P. sp.</i>                           | At-9b        | ADU69377     | 57 | ADU69378     | 65 |
| <i>P. ananatis</i>                      | LMG5342      | CCF09523     | 56 | CCF09522     | 64 |
| <br><u><i>Cronobacter</i></u>           |              |              |    |              |    |
| <i>C. turicensis</i>                    | Z3032        | CBA31265     | 56 | CBA31267     | 61 |
| <i>C. sakazakii</i>                     | ATCC BAA-894 | YP_001437678 | 56 | YP_001437677 | 61 |
| <br><u><i>Others</i></u>                |              |              |    |              |    |
| <i>Rahnella sp.</i>                     | Y9602        | ADW72158     | 58 | ADW72157     | 70 |
| <i>Erwinia billingiae</i>               | Eb661        | CAX59882     | 57 | CAX59883     | 64 |
| <i>Yokenella regensburgei</i>           | ATCC43003    | EHM47523     | 56 | EHM47522     | 62 |

---

1  
2  
3  
4  
5  
6  
7  
8  
9  
10  
11  
12  
13  
14  
15  
16  
17

1 **Table S2.** Bacterial strains and plasmids used in this study

| Strain or plasmid                               | Phenotypes and/or characteristics                                                                                                                                                    | Reference or source          |
|-------------------------------------------------|--------------------------------------------------------------------------------------------------------------------------------------------------------------------------------------|------------------------------|
| <i>B. cenocepacia</i>                           |                                                                                                                                                                                      |                              |
| H111                                            | Wild type strain, Genomovars III of the <i>B. cepacia</i> complex                                                                                                                    | (Huber <i>et al.</i> , 2001) |
| H111(GGDEF)                                     | Wild type strain harboring the expression construct pLAFR3-GGDEF                                                                                                                     | This study                   |
| H111(EAL)                                       | Wild type strain harboring the expression construct pLAFR3-EAL                                                                                                                       | This study                   |
| $\Delta$ rpf <sub>Bc</sub>                      | BDSF-minus mutant derived from H111 with <i>rpf</i> <sub>Bc</sub> being deleted                                                                                                      | This study                   |
| $\Delta$ rpfR                                   | Deletion mutant with <i>rpfR</i> being deleted                                                                                                                                       | This study                   |
| $\Delta$ rpf <sub>Bc</sub> (rpf <sub>Bc</sub> ) | Mutant $\Delta$ rpf <sub>Bc</sub> harboring the expression construct pMLS7-rpf <sub>Bc</sub>                                                                                         | This study                   |
| $\Delta$ rpfR (rpfR)                            | Mutant $\Delta$ rpfR harboring the expression construct pMLS7-rpfR                                                                                                                   | This study                   |
| $\Delta$ rpf <sub>Bc</sub> (rpfR)               | Mutant $\Delta$ rpf <sub>Bc</sub> harboring the expression construct pLAFR3-rpfR                                                                                                     | This study                   |
| $\Delta$ rpf <sub>Bc</sub> (GGDEF-EAL)          | Mutant $\Delta$ rpf <sub>Bc</sub> harboring the expression construct pLAFR3-GGDEF-EAL                                                                                                | This study                   |
| $\Delta$ rpf <sub>Bc</sub> (GGDEF)              | Mutant $\Delta$ rpf <sub>Bc</sub> harboring the expression construct pLAFR3-GGDEF                                                                                                    | This study                   |
| $\Delta$ rpf <sub>Bc</sub> (EAL)                | Mutant $\Delta$ rpf <sub>Bc</sub> harboring the expression construct pLAFR3-EAL                                                                                                      | This study                   |
| $\Delta$ rpf <sub>Bc</sub> (rocR)               | Mutant $\Delta$ rpf <sub>Bc</sub> harboring the expression construct pMLS7-rocR                                                                                                      | This study                   |
| $\Delta$ rpfR (rocR)                            | Mutant $\Delta$ rpfR harboring the expression construct pMLS7-rocR                                                                                                                   | This study                   |
| $\Delta$ rpfRBCAM0227                           | Mutant with <i>rpfR</i> and <i>BCAM0227</i> being deleted and interrupted by pEX18Gm, respectively                                                                                   | This study                   |
| rpfR                                            | Insertional mutant with <i>rpfR</i> being interrupted by pEX18Gm                                                                                                                     | This study                   |
| rpfR(rpfR)                                      | Mutant rpfR harboring the expression construct pBBR-rpfR                                                                                                                             | This study                   |
| rpfR(rpfR <sub>AAL</sub> )                      | Mutant rpfR harboring the expression construct pBBR-rpfR <sub>AAL</sub>                                                                                                              | This study                   |
| rpfR(rpfR <sub>GGAAF</sub> )                    | Mutant rpfR harboring the expression construct pBBR-rpfR <sub>GGAAF</sub>                                                                                                            | This study                   |
| BCAM0227                                        | Insertional mutant with <i>Bcam0227</i> being interrupted by pEX18Gm                                                                                                                 | This study                   |
| <i>E. coli</i>                                  |                                                                                                                                                                                      |                              |
| DH5 $\alpha$                                    | <i>supE44</i> $\Delta$ <i>lacU169</i> ( $\phi$ 80 <i>lacZ</i> $\Delta$ M15) <i>hsdR17</i> <i>recA1</i> <i>endA1</i> <i>gyrA96</i> <i>thi-1</i> <i>relA1</i> $\lambda$ <i>pir</i>     | Laboratory collection        |
| BL21                                            | F' <i>ompT</i> <i>hsdS</i> ( <i>r<sub>B</sub><sup>-</sup>m<sub>B</sub><sup>-</sup></i> ) <i>dcm</i> <sup>+</sup> Tet <sup>r</sup> <i>gal</i> (DE3) <i>endA</i>                       | Stratagene                   |
| OP50                                            | A uracil auxotroph strain as a food source for <i>C. elegans</i>                                                                                                                     | (Brenner, 1974)              |
| XL1-blue                                        | <i>recA1</i> <i>endA1</i> <i>gyrA96</i> <i>thi-1</i> <i>hsdR17</i> <i>supE44</i> <i>relA1</i> <i>lac</i> [F' <i>proAB</i> <i>lac</i> <sup>f</sup> $\Delta$ M15 Tn10 Tet <sup>r</sup> | Stratagene                   |

| Plasmid                    |                                                                               |                              |
|----------------------------|-------------------------------------------------------------------------------|------------------------------|
| pMLS7-rpfF <sub>Bc</sub>   | pMLS7 containing <i>rpfF<sub>Bc</sub></i>                                     | This study                   |
| pMLS7-rpfR                 | pMLS7 containing <i>rpfR</i>                                                  | This study                   |
| pLAFR3-rpfR                | pLAFR3 containing <i>rpfR</i>                                                 | This study                   |
| pEX18Gm                    | pUC18 MCS, <i>sacB<sup>+</sup></i> ; gene replacement vector; Gm <sup>r</sup> | (Hoang <i>et al.</i> , 1998) |
| pEX-rpfR                   | pEX18 containing an internal fragment of <i>rpfR</i>                          | This study                   |
| pEX-0227                   | pEX18 containing an internal fragment of <i>Bcam0227</i>                      | This study                   |
| pBBR-rpfR                  | pBBR1MCS containing <i>rpfR</i> of H111                                       | (Huber <i>et al.</i> , 2002) |
| pBBR-rpfR <sub>AAL</sub>   | pBBR-rpfR harboring an E443A amino acid substitution                          | This study                   |
| pBBR-rpfR <sub>GGAAF</sub> | pBBR-rpfR harboring a D318A and E319A amino acid substitution                 | This study                   |
| pLAFR3-GGDEF-EAL           | pLAFR3 containing the encoding region of the GGDEF and EAL domains of RpfR    | This study                   |
| pLAFR3-GGDEF               | pLAFR3 containing the encoding region of the GGDEF domain of RpfR             | This study                   |
| pLAFR3-EAL                 | pLAFR3 containing the encoding region of the EAL domain of RpfR               | This study                   |
| pMLS7-rocR                 | pMLS7 containing the encoding region of RocR from <i>P. aeruginosa</i>        | This study                   |
| pGEX-rpfR                  | pGEX-6p-1 containing <i>rpfR</i>                                              | This study                   |
| pGEX-PAS                   | pGEX-6p-1 containing the PAS domain of RpfR                                   | This study                   |
| pGEX-GGDEF-EAL             | pGEX-6p-1 containing the GGDEF and EAL domains of RpfR                        | This study                   |

- 1 Brenner, S. (1974). The Genetics of *Caenorhabditis elegans*. *Genetics* 77, 71-94.
- 2 Hoang, T. T., Karkhoff-Schweizer, R. R., Kutchma, a J. & Schweizer, H. P. (1998). A broad-host-  
3 range Flp-FRT recombination system for site-specific excision of chromosomally-located DNA  
4 sequences: application for isolation of unmarked *Pseudomonas aeruginosa* mutants. *Gene* 212,  
5 77-86.
- 6 Huber, B., Riedel, K., Hentzer, M., Heydorn, a, Gotschlich, a, Givskov, M., Molin, S. & Eberl, L.  
7 (2001). The *cep* quorum-sensing system of *Burkholderia cepacia* H111 controls biofilm  
8 formation and swarming motility. *Microbiology* 147, 2517-2528.
- 9 Huber, B., Riedel, K., Köthe, M., Givskov, M., Molin, S. & Eberl, L. (2002). Genetic analysis of  
10 functions involved in the late stages of biofilm development in *Burkholderia cepacia* H111.  
11 *Molecular microbiology* 46, 411-426.

12

13

14

15



1 **Table S3.** PCR primers used in this study

| <b>Primer</b>                  | <b>Sequence (5'-3')</b>                      |
|--------------------------------|----------------------------------------------|
| <i>For deletion</i>            |                                              |
| rpf <sub>BC</sub> L-F          | ggatccgcaccacgtcgaagctctccg                  |
| rpf <sub>BC</sub> L-R          | aagcttttaggtatgtcctcgtgagatgtggttttaa        |
| rpf <sub>BC</sub> R-F          | aagctttaatgacgacgggcccgcg                    |
| rpf <sub>BC</sub> R-R          | tctagagccggctcaggttcatccgtttc                |
| rpfRL-F                        | ggtaccacatgacgaactcgcgg                      |
| rpfRL-R                        | aagcttggacacgccccgatc                        |
| rpfRR-F                        | aagcttgcgtcgttccggacaagg                     |
| rpfRR-R                        | tctagagccggccgttttacgaag                     |
| <i>For in trans expression</i> |                                              |
| rpf <sub>BC</sub> -F           | ggatccatgcaactccaatcccatcc                   |
| rpf <sub>BC</sub> -R           | aagcttttacaccgtgcgagctt                      |
| rpfR-F                         | ggatccatggatgacgaaaacgatagcgc                |
| rpfR-R                         | aagctttcaggcgatcagcctgagcttt                 |
| GGDEF-EAL-F                    | ggatccatgaacaagttcgtgcagagcggc               |
| GGDEF-EAL-R                    | aagctttcaggcgatcagcctgagcttt                 |
| GGDEF-F                        | ggatccatgaacaagttcgtgcagagcggc               |
| GGDEF-R                        | aagctttcactccagcgagaacacgcgatac              |
| EAL-F                          | ggatccatgaaccagaaggtcgcgaagtaca              |
| EAL-R                          | aagctttcaggcgatcagcctgagcttt                 |
| PA3947--F                      | ccggaattccggatgaatgatttgaatgttctgggtgtt      |
| PA3947-R                       | tgctctagagcatcaggatccggagcaatagtcg           |
| <i>For protein expression</i>  |                                              |
| rpfR-F'                        | ggatccatggatgacgaaaacgatagcgc                |
| rpfR-R'                        | cccgggtcaggcgatcagcctgagcttt                 |
| PAS-F                          | ggatccatggatgacgaaaacgatagcgc                |
| PAS-R                          | tccccgggtcagcggaaactggaacaggcgc              |
| GGDEF-EAL-F                    | cgcggatccatgaacaagttcgtgcagagcggc            |
| GGDEF-EAL-R                    | cccgggtcaggcgatcagcctgagcttt                 |
| <i>For plasmid mutagenesis</i> |                                              |
| AAL-fw                         | ggcgacgtgcacggcgtcgcggcgctgatccgccagtcg      |
| AAL-rev                        | cgactggcggatcagcgccgcgacgccgtgcacgtcgcc      |
| GGAAF-fw                       | gctcgcgcggctcggcggcgccgcattcctcgtgctgttcgaac |
| GGAAF-rev                      | gttcgaacagcacgaggaatgcggcgccgcccagccgcgcgagc |

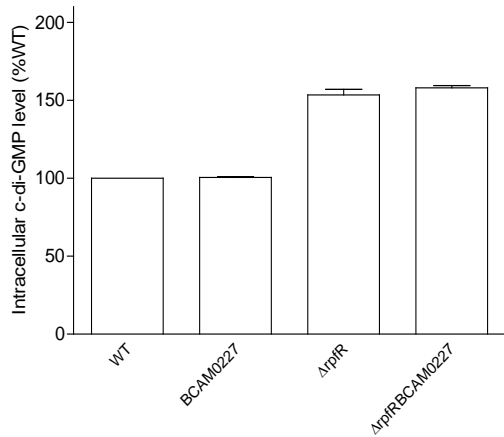

1

2 **Fig. S1.** Influence of BCAM0227 and RpfR on intracellular cyclic-di-GMP level.

3 Detection of intracellular cyclic-di-GMP level by high-performance liquid

4 chromatography (HPLC) assay. The relative amount of cyclic-di-GMP was calculated

5 based on their peak areas. For the convenience of comparison, cyclic-di-GMP level

6 of *B. cenocepacia* wild-type strain H111 was arbitrarily defined as 100% and used to

7 normalize the cyclic-di-GMP level ratios of the other strains. The data shown are the

8 means of two repeats and error bars indicate the standard deviations.

9

10

11

12

13

14

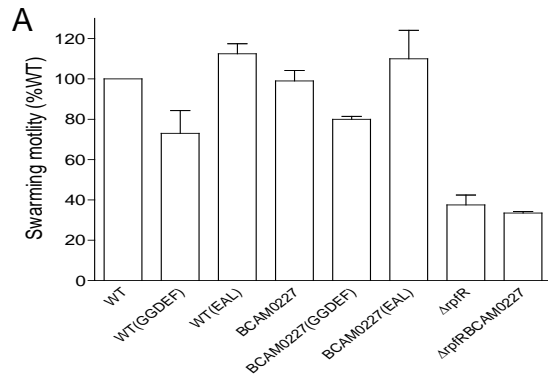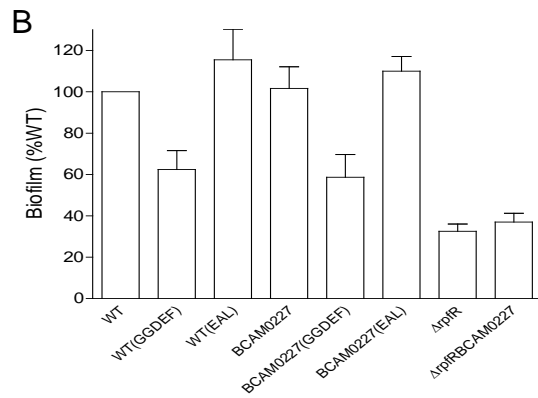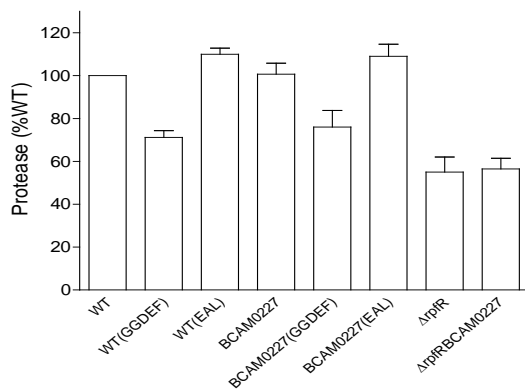

3

4 **Fig. S2.** Mutation of *BCAM0227* does not affect *rpfR*-regulated phenotypes. The wild  
 5 type, the *BCAM0227* mutant, the *rpfRBCAM0227* double mutant, and the derivatives  
 6 of these strains expressing the coding regions of the GGDEF and EAL domains of  
 7 RpfR were tested for BDSF-regulated phenotypes. (A) swarming motility, (B), biofilm  
 8 formation, and (C) protease production. The data shown are the means of three  
 9 replicates and error bars indicate the standard deviations.

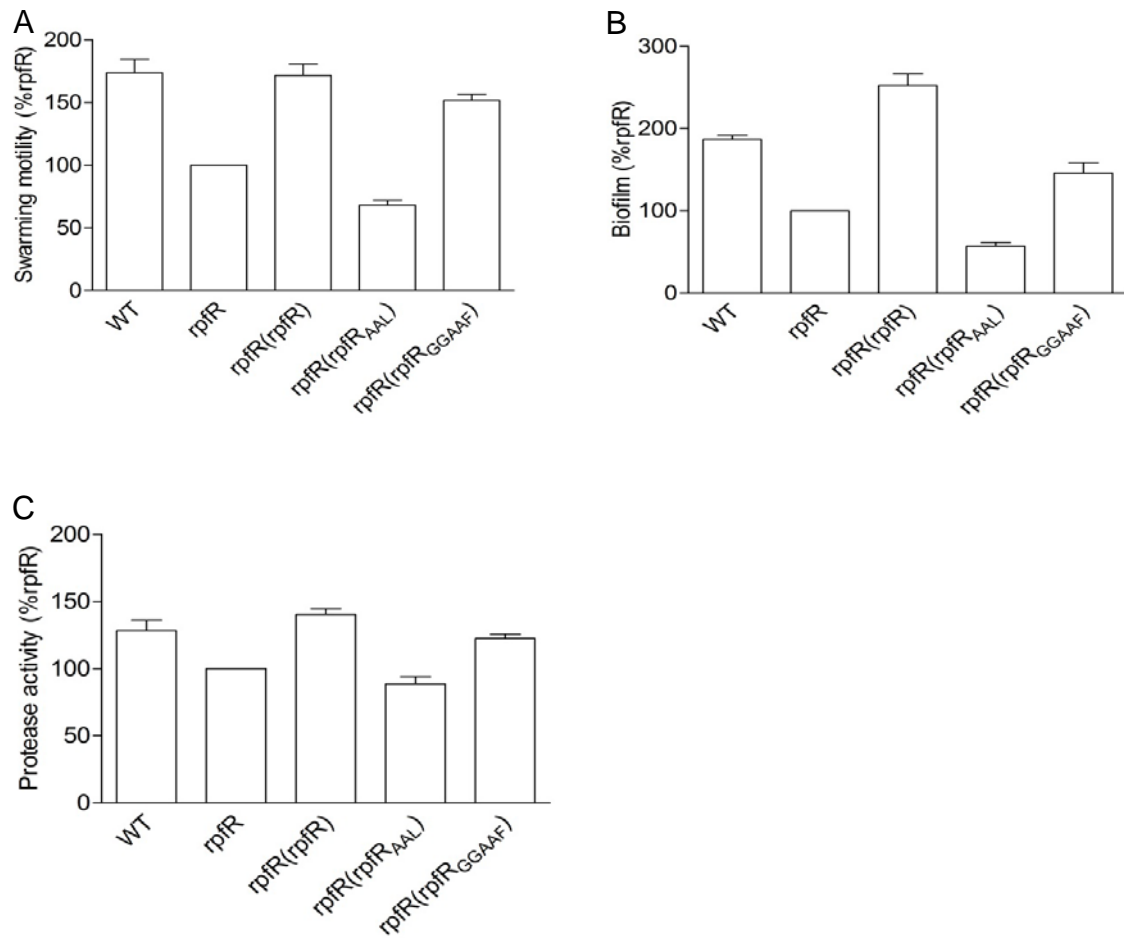

1

2

3 **Fig. S3.** Complementation of *rpfR* with RpfR, RpfR<sub>AAL</sub> and RpfR<sub>GGAAAF</sub>. *In trans*  
 4 expression of RpfR and RpfR<sub>GGAAAF</sub> complemented swarming motility (A), biofilm  
 5 formation (B) and protease activity (C) of a RpfR deficient mutant, whereas  
 6 expression of RpfR<sub>AAL</sub> failed to restore the phenotypic defects of a *rpfR* mutant  
 7 background. The data shown are the means of three replicates and error bars  
 8 indicate standard errors.

9

10

11

12

13

14

15

16

17

18

1

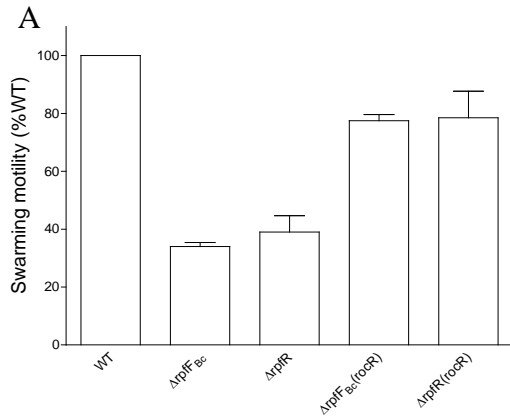

2

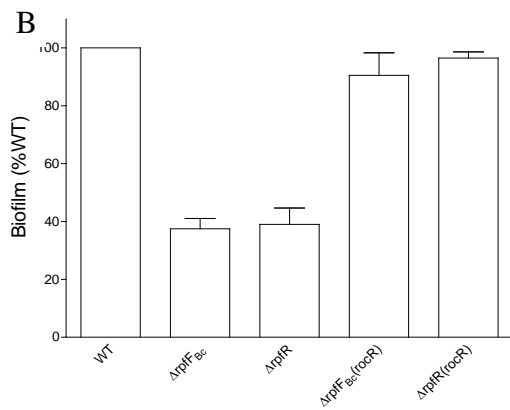

3

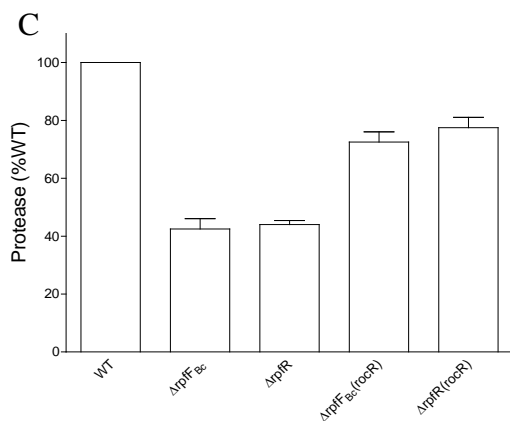

4

5 **Fig. S4.** *In trans* expression of *rocR* (PA3947) from *Pseudomonas aeruginosa*

6 rescued the phenotype defects of  $\Delta rpf_{Bc}$  and  $\Delta rpfR$  in swarming motility (A), biofilm

7 formation (B), and protease production (C). The data shown are the means of two

8 replicates and error bars indicate the standard deviations.

9

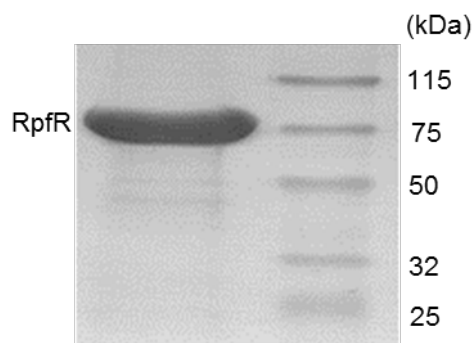

**Fig. S5.** SDS-PAGE gel electrophoresis of the purified RpfR protein.

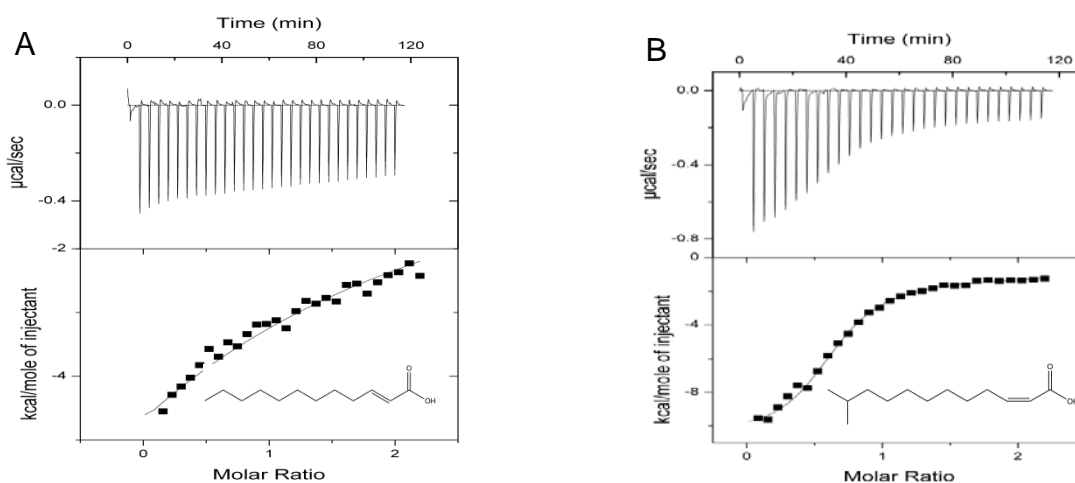

**Fig. S6.** ITC analysis of interaction between BDSF analogues and RpfR. (A) ITC titration of 20  $\mu$ M RpfR with 200  $\mu$ M *trans*-isomer of BDSF in PBS buffer at 21°C. (B) ITC titration of 20  $\mu$ M RpfR with 200  $\mu$ M DSF in PBS buffer at 21°C.

1

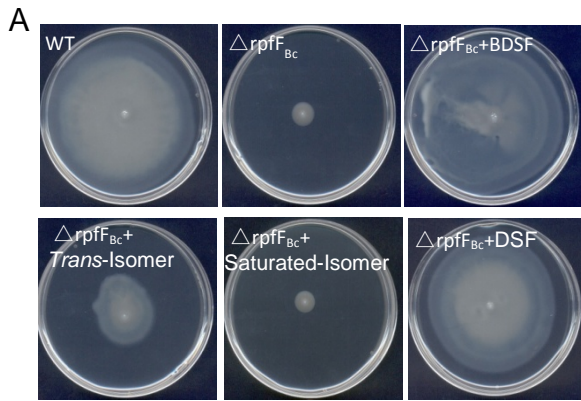

2  
3

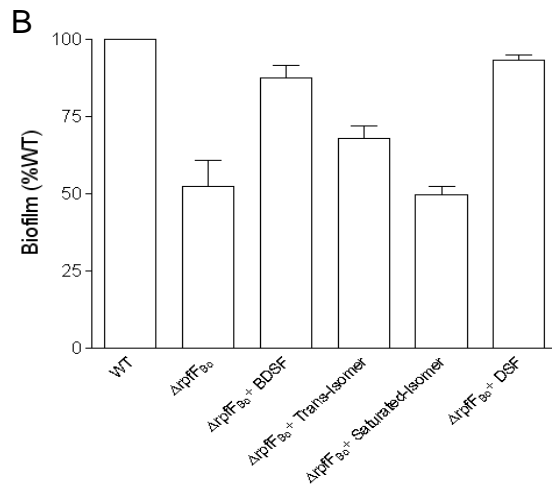

4

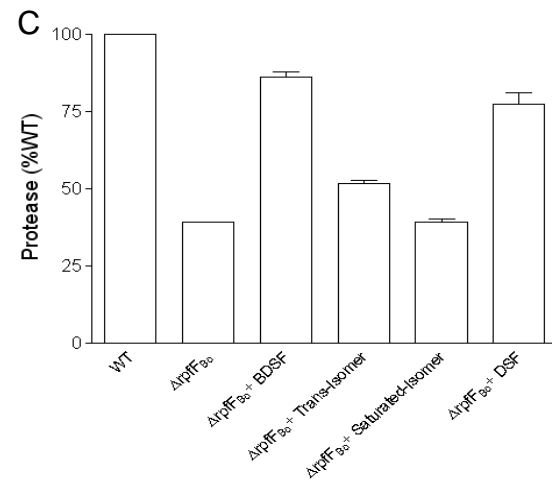

5

6 **Fig. S7.** Effect of BDSF and analogues on BDSF-regulated phenotypes. (A)  
7 Swarming motility, (B) biofilm formation, and (C) protease production. The  
8 compounds were added separately at a final concentration of 5  $\mu$ M. The data shown  
9 are the means of three replicates and error bars indicate the standard deviations.

10

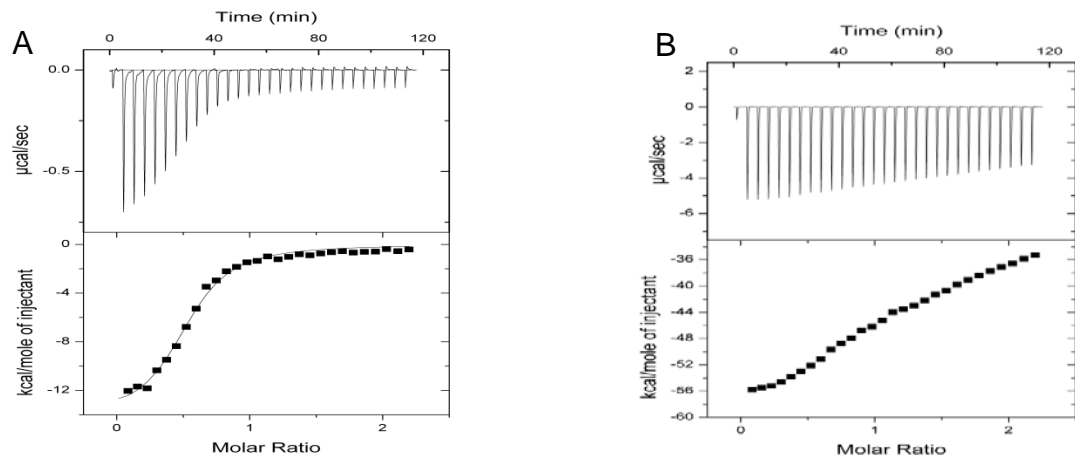

1  
 2 **Fig. S8.** ITC analysis of interaction between BDSF and RpfR domains. (A) ITC  
 3 titration of 20  $\mu\text{M}$  PAS domain of RpfR with 200  $\mu\text{M}$  BDSF in PBS buffer at 21°C. (B)  
 4 ITC titration of 20  $\mu\text{M}$  GGDEF-EAL domain of RpfR with 200  $\mu\text{M}$  BDSF in PBS buffer  
 5 at 21°C.  
 6



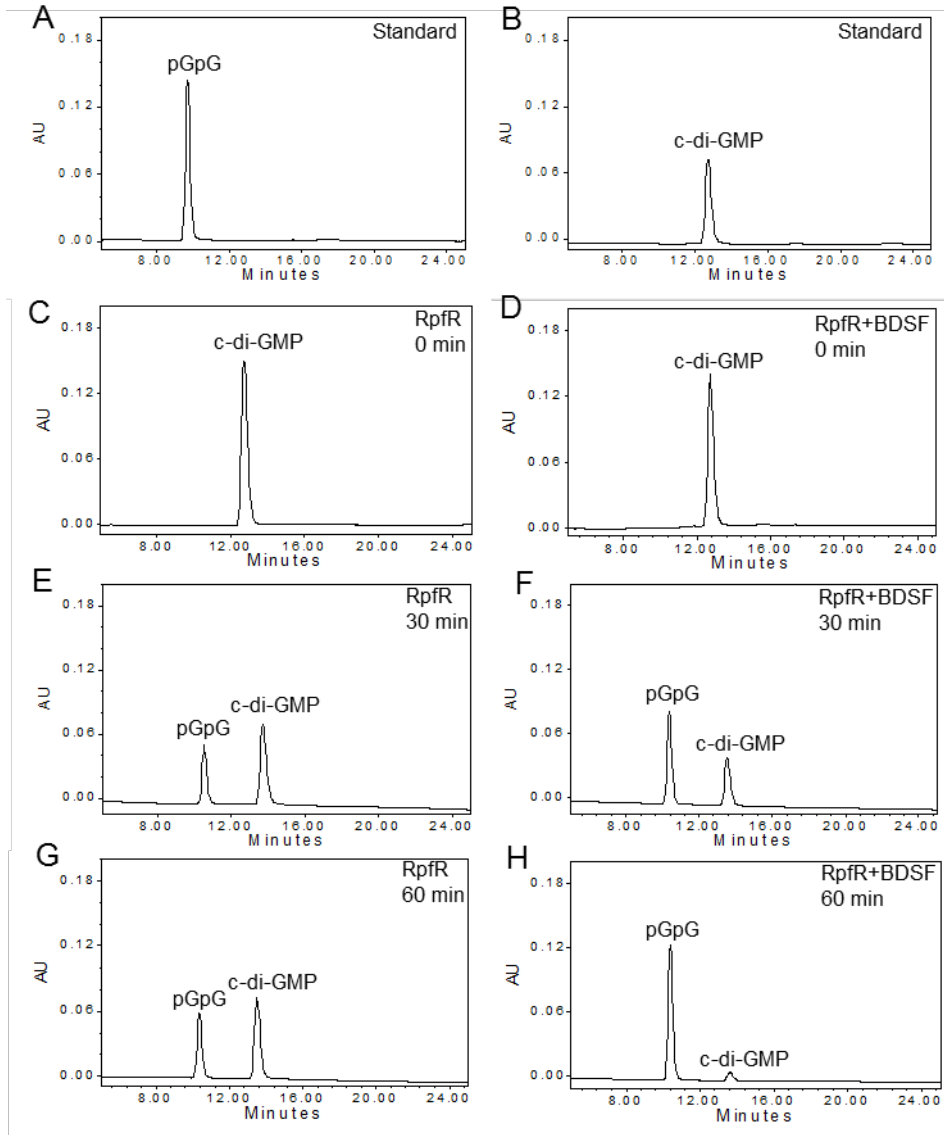

1

2

3 **Fig. S9.** HPLC analysis of RpfR cyclic-di-GMP phosphodiesterase activity. HPLC  
 4 analysis of the standard pGpG (A) and cyclic-di-GMP (B). The HPLC chromatograms  
 5 in the absence and presence of BDSF at 0 min (C, D), 30 min (E, F), and 60 min (G,  
 6 H), respectively.

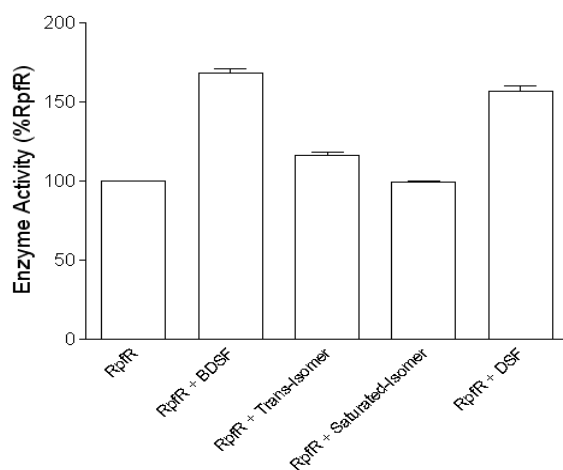

1

2 **Fig. S10.** Effects of BDSF and analogues on RpfR enzyme activity. For the  
 3 convenience of comparison, enzyme activity of RpfR at 30 min was defined as 100%  
 4 and used to normalize the cyclic-di-GMP degradation activity of RpfR in the  
 5 presence of different ligands. The data shown are the means of two replicates and  
 6 error bars indicate the standard deviations.

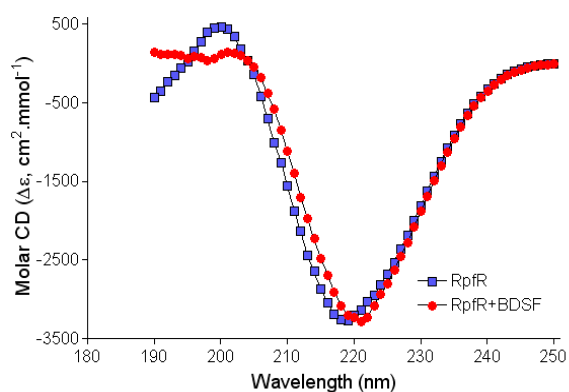

7

8 **Fig. S11.** Impact of BDSF on RpfR protein conformation.

9
